# Supplementary material for: Association between Dietary Pattern and Periodontitis—A Cross-Sectional Study
Source: MDPI journal article supplement (doi:10.3390/nu13114167), 2021-11-21
Supplement: s1 [file s1]

**Table S1.** Baseline characteristics.

|                                           | Male                      | Female                    | p-value<br>for Trend |
|-------------------------------------------|---------------------------|---------------------------|----------------------|
| <b>n (%), median [IQR],<br/>* mean/SD</b> | 4892                      | 5108                      |                      |
| <b>DEMOGRAPHICS</b>                       |                           |                           |                      |
| Age                                       | 64.00 [56.00,70.00]       | 62.00 [55.00,69.00]       | <0.001               |
| Education                                 |                           |                           | <0.001               |
| Low                                       | 149 (3.2)                 | 295 (6.1)                 |                      |
| Medium                                    | 1990 (43.2)               | 2840 (58.8)               |                      |
| High                                      | 2465 (53.5)               | 1698 (35.1)               |                      |
| <b>CARDIOVASCULAR RISK</b>                |                           |                           |                      |
| BMI                                       | 26.68 [24.50,29.44]       | 25.30 [22.63,28.89]       | <0.001               |
| Smoking                                   | 981 (20.2)                | 997 (19.6)                | <0.505               |
| Diabetes                                  | 490 (10.8)                | 304 (6.5)                 | <0.001               |
| Hypertension                              | 3398 (73.1)               | 2903 (59.5)               | <0.001               |
| <b>LABORATORIES</b>                       |                           |                           |                      |
| IL6                                       | 1.67 [1.22,2.38]          | 1.55 [1.12,2.25]          | <0.001               |
| CRP                                       | 0.12 [0.06,0.26]          | 0.12 [0.06,0.27]          | 0.334                |
| <b>NUTRITION</b>                          |                           |                           |                      |
| Total energy (kcal/day)                   | 2391.24 [1937.93,2935.64] | 1761.34 [1443.94,2133.69] | <0.001               |
| Fibre (g/day)                             | 20.42 [15.74,25.78]       | 17.32 [13.91,21.65]       | <0.001               |
| Protein (g/day)                           | 84.20 [67.54,102.98]      | 61.76 [50.00,74.99]       | <0.001               |
| Fat (g/day)                               | 104.78 [84.16,131.06]     | 77.38 [62.57,94.87]       | <0.001               |
| Carbohydrates (g/day)                     | 227.70 [177.25,287.87]    | 172.00 [137.68,216.20]    | <0.001               |
| Alcohol (g/day)                           | 13.70 [4.09,29.45]        | 6.21 [1.62,16.73]         | <0.001               |
| Saccharides                               | 96.60 [72.05,128.16]      | 83.95 [64.05,109.81]      | <0.001               |
| DASH diet                                 | 4.00 [3.50,5.00]          | 5.00 [4.00,5.50]          | <0.001               |
| Mediterranean Diet                        | 4.00 [3.00,5.00]          | 5.00 [4.00,6.00]          | <0.001               |
| <b>PHYSICAL ACTIVITY</b>                  |                           |                           |                      |
| Physical activity                         | 2826 (66.0)               | 3239 (73.1)               | <0.001               |
| Sport (h/week)                            | 2.00 [0.00,4.00]          | 2.00 [0.00,4.00]          | 0.001                |
| <b>DENTAL VARIABLES</b>                   |                           |                           |                      |
| DMFT index                                | 19.00 [15.00,24.00]       | 20.00 [16.00,23.00]       | 0.741                |
| BOP index                                 | 8.70 [2.00,21.43]         | 7.41 [1.85,19.23]         | 0.001                |
| Plaque index                              | 12.50 [0.00,38.02]        | 5.56 [0.00,23.08]         | <0.001               |
| <b>PERIODONTITIS</b>                      |                           |                           |                      |
| None/mild PA                              | 575 (18.8)                | 878 (27.9)                |                      |
| Moderate PA                               | 1766 (57.8)               | 1814 (57.6)               |                      |
| Severe PA                                 | 716 (23.4)                | 460 (14.6)                |                      |

**Abbreviations:** BMI = Body Mass Index, BOP Index = Bleeding on Probing Index, DMFT Index = Decayed, Missing, Filled, Teeth Index, CRP = High sensitive c-reactive protein, IL6 = Interleukin 6, PA = periodontitis.

**Table S2.** Baseline dental characteristics stratified according to DASH Diet.

|                          | <b>Low:Male</b>        | <b>High:Male</b>       | <b>Medium:Male</b>     | <b>Low:Female</b>      | <b>High:Female</b>     | <b>Medium:Female</b>   |
|--------------------------|------------------------|------------------------|------------------------|------------------------|------------------------|------------------------|
| <b>n*</b>                | 1651                   | 16                     | 2736                   | 608                    | 27                     | 3982                   |
| <b>DMFT-index</b>        | 20.00<br>[16.00,24.00] | 18.50<br>[14.00,22.00] | 19.00<br>[15.00,23.00] | 20.00<br>[16.00,24.00] | 19.00<br>[13.75,21.25] | 19.00<br>[16.00,23.00] |
| <b>BOP index</b>         | 8.93<br>[2.08,23.08]   | 4.95 [3.70,12.01]      | 8.33<br>[2.00,20.28]   | 7.14<br>[1.82,20.83]   | 8.33<br>[1.44,15.43]   | 7.14<br>[1.85,18.75]   |
| <b>Plaque index</b>      | 12.50<br>[0.00,39.29]  | 6.33 [0.00,40.74]      | 11.54<br>[0.00,35.19]  | 7.14<br>[0.00,23.80]   | 6.25<br>[0.00,23.08]   | 5.26<br>[0.00,22.73]   |
| <b>Periodontitis (%)</b> |                        |                        |                        |                        |                        |                        |
| <b>None/mild</b>         | 199 (19.8)             | 2 (20.0)               | 333 (18.9)             | 105 (28.8)             | 7 (35.0)               | 681 (27.5)             |
| <b>Moderate</b>          | 572 (56.9)             | 6 (60.0)               | 1026 (58.2)            | 203 (55.6)             | 11 (55.0)              | 1446 (58.4)            |
| <b>Severe</b>            | 235 (23.4)             | 2 (20.0)               | 405 (23.0)             | 57 (15.6)              | 2 (10.0)               | 350 (14.1)             |

**Abbreviations:** BOP Index = Bleeding on Probing Index, DMFT Index = Decayed, Missing, Filled, Teeth Index, n\* = Adherence score could be assessed for 9020 participants – every column does not sum up to 100%, because of missing values for different variables.

**Table S3.** Baseline dental characteristics stratified according to Mediterranean Diet.

|                          | <b>Low:Male</b>        | <b>High:Male</b>       | <b>Medium:Male</b>     | <b>Low:Female</b>      | <b>High:Female</b>     | <b>Medium:Female</b>   |
|--------------------------|------------------------|------------------------|------------------------|------------------------|------------------------|------------------------|
| <b>n*</b>                | 2904                   | 10                     | 1489                   | 1685                   | 41                     | 2891                   |
| <b>DMFT-index</b>        | 20.00<br>[16.00,24.00] | 15.00<br>[13.00,19.00] | 19.00<br>[15.00,23.00] | 20.00<br>[16.00,23.00] | 22.50<br>[16.75,26.25] | 19.00<br>[16.00,23.00] |
| <b>BOP index</b>         | 9.09<br>[2.08,23.21]   | 9.09<br>[4.91,13.85]   | 7.41<br>[1.92,18.42]   | 7.69<br>[1.92,21.15]   | 11.61<br>[0.45,26.34]  | 7.14<br>[1.85,18.00]   |
| <b>Plaque index</b>      | 12.50<br>[0.00,38.46]  | 3.57<br>[0.00,54.63]   | 10.71<br>[0.00,32.69]  | 6.25<br>[0.00,25.00]   | 3.57<br>[0.00,22.73]   | 4.76<br>[0.00,21.15]   |
| <b>Periodontitis (%)</b> |                        |                        |                        |                        |                        |                        |
| <b>None/mild</b>         | 359 (19.7)             | 2 (33.3)               | 173 (18.2)             | 285 (27.5)             | 5 (19.2)               | 503 (28.0)             |
| <b>Moderate</b>          | 1040 (57.0)            | 2 (33.3)               | 562 (59.2)             | 593 (57.2)             | 17 (65.4)              | 1050 (58.4)            |
| <b>Severe</b>            | 425 (23.3)             | 2 (33.3)               | 215 (22.6)             | 159 (15.3)             | 4 (15.4)               | 246 (13.7)             |

**Abbreviations:** BOP Index = Bleeding on Probing Index, DMFT Index = Decayed, Missing, Filled, Teeth Index, n\* = Adherence score could be assessed for 9020 participants – every column does not sum up to 100%, because of missing values for different variables.

**Table S4.** Logistic regression: outcome binary variable periodontitis (no vs. severe periodontitis), exposure DASH Diet.

| Variable         | Units  | Odds Ratio | 95% CI       | p-value |
|------------------|--------|------------|--------------|---------|
| <b>DASH diet</b> |        | 0.90       | [0.82;0.98]  | 0.0201  |
| <b>Age</b>       |        | 1.08       | [1.07;1.10]  | <0.001  |
| <b>Sex</b>       | Male   | Ref        |              |         |
|                  | Female | 0.48       | [0.40;0.58]  | <0.001  |
| <b>DASH diet</b> |        | 0.91       | [0.83;0.99]  | 0.0341  |
| <b>Age</b>       |        |            |              |         |
|                  | 45-54  | Ref        |              |         |
|                  | 55-64  | 2.55       | [2.01;3.24]  | <0.001  |
|                  | 65-74  | 4.71       | [3.70;5.98]  | <0.001  |
|                  | 75+    | 8.55       | [5.55;13.20] | <0.001  |
| <b>Sex</b>       | Male   | Ref        |              |         |
|                  | Female | 0.49       | [0.40;0.58]  | <0.001  |

**Abbreviations:** DASH = Dietary Approach to Stop Hypertension, CI = confidence

**Table S5.** Logistic regression: outcome binary variable periodontitis (no vs. severe periodontitis), exposure Mediterranean Diet.

| Variable                  | Units  | Odds Ratio | 95% CI       | p-value |
|---------------------------|--------|------------|--------------|---------|
| <b>Mediterranean Diet</b> |        | 0.94       | [0.89;0.98]  | 0.00845 |
| <b>Age</b>                |        | 1.08       | [1.07;1.10]  | <0.001  |
| <b>Sex</b>                | Male   | Ref        |              |         |
|                           | Female | 0.49       | [0.41;0.59]  | <0.001  |
| <b>Mediterranean Diet</b> |        | 0.94       | [0.89;0.98]  | 0.0093  |
| <b>Age</b>                |        |            |              |         |
|                           | 45-54  | Ref        |              |         |
|                           | 55-64  | 2.53       | [1.99;3.22]  | <0.001  |
|                           | 65-74  | 4.66       | [3.67;5.92]  | <0.001  |
|                           | 75+    | 8.45       | [5.49;13.02] | <0.001  |
| <b>Sex</b>                | Male   | Ref        |              |         |
|                           | Female | 0.49       | [0.41;0.60]  | <0.001  |

**Abbreviations:** CI = confidence
